# 1 Improving capacity for advanced training in obstetric 2 surgery: Evaluation of a blended learning approach

3  
4  
5 Helen Allott<sup>1\*</sup>, Alan Smith<sup>1</sup>, Sarah White<sup>1</sup>, Irene Nyaoke<sup>2</sup>, Ogoti Evans<sup>3</sup>, Michael Oriwo Oduor<sup>4</sup>, Steven  
6 Karangau<sup>5</sup>, Sheila Sawe<sup>3</sup>, Nassir Shaaban<sup>3</sup>, Ochola Ephraim<sup>3</sup>, Charles Anawo Ameh<sup>1,6</sup>

7  
8  
9 <sup>1</sup> Emergency Obstetric Care and Quality of Care Unit, Liverpool School of Tropical Medicine (LSTM),  
10 Liverpool, United Kingdom

11 <sup>2</sup> Liverpool School of Tropical Medicine Kenya, Nairobi, Kenya

12 <sup>3</sup> Directorate of Reproductive Health, Moi University Teaching and Referral Hospital (MTRH), Eldoret,  
13 Kenya

14 <sup>4</sup> Bondo Subcounty Hospital, Bondo, Kenya

15 <sup>5</sup> Muriranjas Subcounty Hospital, Murang'a, Kenya

16 <sup>6</sup> University of Nairobi, Nairobi, Kenya

17  
18  
19 \* Corresponding author

20 Email: [Helen.Allott@lstmed.ac.uk](mailto:Helen.Allott@lstmed.ac.uk) (HA)

21

**NOTE: This preprint reports new research that has not been certified by peer review and should not be used to guide clinical practice.**

## 22 Abstract

23

## 24 Introduction

25

26 Significant differences in outcomes for mothers and babies following obstetric surgical interventions

27 between low- and middle-income countries and high-income settings have demonstrated a need for

28 improvements in quality of care and training of obstetric surgical and anaesthetic providers. To

29 address this a five-day face-to-face training intervention was developed. When the COVID-19

30 pandemic interrupted its roll-out, the course was redesigned for delivery by blended learning.

31

## 32 Methods

33

34 This 3-part blended-learning course (part-1: 15 hours self-directed online learning, part-2: 13 hours

35 facilitated virtual workshops and part-3: 10 hours face-to-face delivery), was conducted in Kenya.

36 We assessed the completion rate of part-1 (21 assignments), participation rate in parts 2 and 3,

37 participant satisfaction, change in knowledge and skills and compared the cost of the blended

38 delivery compared to the 5-day face-to-face delivery, in GB Pounds.

39

## 40 Results

41

42 65 doctors took part in part 1, 53 completing at least 90% of the assignments. 60 doctors

43 participated in part 2, and 53 participated in part 3. Participants completing an evaluation reported

44 (n=53) attending the training was a good use of their time (each of parts-1 and 3: 98%, part-2: 94%)

45 and would recommend this to other colleagues (part-1 and 3: 98%, part-2: 90%). Mean (SD)

46 knowledge score improved from 64% (7%) to 80% (8%) and practical skills from 44% (14%) to 87%

47 (7%). The blended course achieved a cost-saving of £207 per participant compared to the 5-day face-

48 to-face delivery approach.

49

## 50 Conclusion

51  
52 We have demonstrated that a blended learning approach to clinical training in a low resource setting  
53 is feasible, acceptable and more cost effective. More studies are required to investigate the  
54 effectiveness of this approach on health outcomes.

55

56

## 57 Introduction

58  
59 Improving access to quality maternal and newborn health services, while addressing context specific  
60 challenges, is critical to meeting the global maternal health Sustainable Development Goal target of  
61 less than 70 maternal deaths per 100,000 live births by 2030 (1). Caesarean section (CS) is a life-  
62 saving emergency obstetric care major surgical procedure that, if performed when indicated, should  
63 reduce the risk of maternal and perinatal mortality. Boerma and colleagues reported in 2018 that  
64 21.1% (29.7 million) of births that occurred globally in 2015 were by CS. There was also an increasing  
65 trend in CS rates in some world regions and in others it was still suboptimal (2). Population based CS  
66 rates above 20% have not been shown to improve perinatal or neonatal outcomes (3) and rates of  
67 less than 10%, as seen in many low-income and middle-income countries, indicate inadequate access  
68 to medically indicated CS (4). Short and long-term risks to CS have been reported, the CS related  
69 maternal mortality ratio in LMICs is 100 times more than in high income countries and a high  
70 stillbirth rate associated with CS of 82.5 per 1, 000 has been reported (5–9).

71

72 Interventions to reduce unnecessary CS need to address the drivers of excessive and inappropriate  
73 use of CS at three levels: a) childbearing women, families, communities and broader society, b)  
74 health professionals c) health systems, financial reimbursements, organisational design and cultures.  
75 These interventions include clinical and non-clinical interventions to achieve meaningful reductions  
76 in the risk from CS (10). The systematic review by Sobhy and colleagues identified 3 themes to be

77 addressed for optimal outcomes from caesarean sections: 1) access to safe surgery, 2) the  
78 management of perioperative complications in Low and Middle Income Countries (LMICs) and 3)  
79 labour related complications related to the second stage of labour. Caesarean sections performed in  
80 the second stage of labour can be very challenging especially for less experienced doctors. Assisted  
81 vaginal birth with vacuum delivery device, when indicated, may be a safer option. In a multi-country  
82 review of assisted vaginal delivery, Bailey et al found that one of the prime reasons for low levels of  
83 assisted vaginal delivery in LMICs was a lack of staff training, underlining the need to provide  
84 enhanced training in this procedure (11).

85  
86 The first Confidential Inquiry into Maternal Deaths in Kenya report, published in 2018, showed that  
87 37% of women who died had had a caesarean section. Delays in starting treatment, inadequate  
88 clinical skills and inadequate monitoring were found to be the significant health workforce factors  
89 associated with these deaths (9). Therefore, in 2018 we designed a health worker training  
90 intervention that addressed these factors, plus the key themes identified in a systematic review (7)  
91 and the lack of skills to perform assisted vaginal birth. When the covid-19 pandemic rendered it  
92 impossible to continue with delivering this training face-to-face, we adapted the course delivery to  
93 suit a blended learning delivery model. Blended learning has been described as “learning that  
94 happens in an instructional context which is characterized by a deliberate combination of online and  
95 classroom-based interventions to instigate and support learning” (12). Successful blended learning  
96 requires the integration of both virtual and face-to-face methods, rather than merely using the on-  
97 line component as an add-on to classroom teaching.

98  
99 The objective of this paper is to describe and evaluate the blended learning version of Liverpool  
100 School of Tropical Medicine’s Advanced Obstetric Surgical and Anaesthetic Care training package.

101

102

## 103 Methods

104

### 105 Study setting

106

107 We recruited 69 potential participants from Ministry of Health public hospitals in the five counties in

108 Kenya (Garrisa, Taita Taveta, Kilifi, Usain Gishu and Vihiga) supported by the United Kingdom's

109 Foreign and Commonwealth Development Office Kenya's Maternal and Newborn Health (MNH)

110 programme. All participants were medical doctors with experience ranging from first year interns

111 (four) through to consultants (eleven) and residents in training (four), but the majority were medical

112 officers (MOs), four of whom had six or more years-experience. Forty-six MOs had been in post for

113 between one and five years. In sub-county and county hospitals medical officers are often

114 responsible for providing obstetric care without consultant supervision.

115

### 116 Intervention

117

118 The LSTM Advanced Obstetric Surgical and Anaesthetic Course (AOAC) was created based on our

119 experience designing, implementing and evaluating the LSTM Emergency Obstetric and Newborn

120 Care training package (13-17). Both courses are based on principles of adult learning and a

121 structured approach to teaching (18).

122

123 The objectives of the AOAC are to improve capacity 1) for decision making, and leadership of

124 maternity care teams, 2) to provide quality perinatal care, 3) to perform caesarean sections safely,

125 and 4) to perform assisted vaginal birth, by addressing the topics listed in Box 1. Facilitator and

126 participant manuals are made available to facilitate learning and standardise teaching (19, 20).

127

128 ***Box 1: Key topics covered in the LSTM AOAC course.***

- Improving decisions for operative obstetric births
- Labour ward leadership and management

- Improving interdisciplinary communication skills
- Safe anaesthesia and surgery
- Enhanced surgical skills for routine and complex caesarean surgery.
- Advanced skills in assisted vaginal delivery and perineal trauma repair.
- Detection and management of post-operative complications including use of obstetric early warning system.
- Patient counselling skills, consent
- Improving quality of care, respectful maternity care
- Performing clinical audit, maternal death surveillance and response
- Action planning

129

130 This course, originally designed and delivered as an entirely face to face intervention for up to 28  
131 participants, followed a journey. It commenced with decision-making for operative birth, then  
132 patient consent and preparation for surgery and safe surgical and anaesthetic practices for  
133 Caesarean section. There was also an emphasis on assisted vaginal birth techniques and post-  
134 operative care, management of complications, patient counselling for future birth and the use of  
135 audit as a quality improvement tool. The training culminated with participants working in functional  
136 teams to develop implementation plans and strategies to put their preferred changes, based on their  
137 learning, into practice upon their return to work.

138

139 For the blended learning version, we reduced the face-to-face component to a 1.5-day duration  
140 focused on skill acquisition using models. The course lectures were recorded and divided into  
141 smaller sections interspersed with on-line activities, to encourage user participation, and clinical  
142 scenarios, role-plays and workshops were adapted for on-line discussion groups.

143

## 144 **Standard training package**

145

146 The standard 5-day AOAC package developed and piloted in Cambodia, Nigeria and Kenya before the  
147 COVID 19 pandemic, consisted of brief lectures (31% or 10 hours of the whole course) interspersed  
148 with interactive small group activities (39% or 13 hours of the whole course) such as facilitator led  
149 interactive workshops, simulation-based learning (clinical scenarios and role playing) and practical

150 skills sessions (30% or 10 hours of the whole course) with the use of obstetric, anaesthetic and  
 151 newborn care mannequins (Table 1). The objective of the five-day interactive training course,  
 152 targeted at obstetric and anaesthetic service providers, was to enhance decision making, teamwork  
 153 and practical skills in obstetric surgery and anaesthesia, to improve maternal and newborn  
 154 outcomes.

155

156 **Table 1: Comparison of duration of each training approach and trainer requirement**  
 157

|                                                             | Duration in hours (% of total)                |                                      |                                       |
|-------------------------------------------------------------|-----------------------------------------------|--------------------------------------|---------------------------------------|
|                                                             | Learning approach                             | Standard 5-day face-to-face approach | Alternative blended learning approach |
| <b>Knowledge</b> (face-to-face, self-directed or virtual)   | Lectures                                      | 10 (31%)                             | 15 (40%)                              |
|                                                             | Workshops                                     | 13 (39%)                             | 12.5 (33%)                            |
| <b>Practical skills</b> (face-to-face)                      | Simulation Based Education, hands-on training | 10 (30%)                             | 10 (27%)                              |
| <b>Total duration in hours (days)</b>                       |                                               | 33 hours (5 days)                    | 37.5 (5 days)                         |
| <b>Facilitator/participant ratio for practical sessions</b> |                                               | 1:4                                  | 1:4                                   |
| <b>Total number of facilitators per practical session</b>   |                                               | 8                                    | 6                                     |

158

159 The face-to-face course was attended by a multidisciplinary group of skilled health workers including  
 160 obstetricians, medical officers and obstetric trainees, anaesthetists and peri-operative care nurses.

161 The obstetricians, medical officers and obstetric trainees attended for the full five days and  
 162 anaesthetists/peri-operative nurses for three days. For two days participants from both specialities  
 163 worked together and on one day they were provided with advanced skills training relevant to their  
 164 respective specialities.

165

166 The training culminated with participants working together in facility teams to formulate action  
 167 plans based on the training to improve their practice and quality of care provided afterwards.

168

## 169 Blended training approach

170

171 During the Covid pandemic, training was provided purely to obstetric cadres because the anaesthetic  
172 trainers were not available due to Covid-related clinical commitments. The blended learning  
173 approach consisted of three basic components: self-directed learning consisting of recorded lectures  
174 (40% or 15 hours of the whole course), workshops delivered through five real-time interactive small  
175 group facilitator lead learning discussions (33% or 12.5 hours of the whole course) followed by 1.5  
176 days of face-to-face practical skills training (27% or 10 hours of the whole course). The blended-  
177 learning course takes slightly longer to complete (37.5 hours versus 33 for the face-to-face version.  
178 This is due to an estimated longer period to complete the self-directed learning component of  
179 listening to the recorded lectures and accompanying activities (Table1).

180

181 We used the limited version of the Google® Classroom learning platform to pilot the self-directed  
182 component. The lectures from the original course were recorded and uploaded to YouTube® and the  
183 duration of time each participant spent listening to each lecture was monitored on the learning  
184 platform. To enhance concentration and interest, the 21 lectures were divided into short sections,  
185 mostly lasting between 5 to 10 minutes, interspersed with a variety of participatory activities,  
186 including short videos and questions. To encourage engagement, at the end of each lecture  
187 participants were required to complete a short quiz. Once the quiz had been completed and  
188 submitted, participants were enabled to access the correct answers for the questions together with  
189 brief explanations regarding the rationale underlying these answers.

190

191 The interactive small group guided discussions lasted 2.5 hours each. Participants were divided into  
192 eight groups, each with two facilitators leading participants through a pre-prepared script to guide  
193 the discussion. Topics covered included respectful care, decision-making skills for operative birth,  
194 informed consent, prioritisation and triage on the labour ward, use of the World Health Organisation  
195 (WHO) Safe Surgical Check List, safe operating procedures and recognition of the deteriorating



196 patient intra- and post-operatively, managing post-operative patients using an obstetric early  
197 warning system, prevention, identification and management of intra- and post-operative  
198 haemorrhage and other post-operative complications, safe blood transfusion, analgesia,  
199 documentation, counselling for future births, audit and Maternal Death Surveillance and Response  
200 together with training on action planning.

201

202 The surgical skills selected for the face-to-face training component included assisted vaginal birth,  
203 obstetric anal sphincter injury repair, insertion of B-Lynch sutures, improved techniques for knot-  
204 tying and uterine incision closure, extraction of an impacted fetal head, balloon tamponade after  
205 placenta praevia and venous cut-down, together with revision of airway assessment and  
206 management skills, and newborn resuscitation.

207

## 208 **Study design and evaluation framework**

209

210 We used a cross sectional study design and the adapted Kirkpatrick's training evaluation framework,  
211 previously described to evaluate the participants engagement, acceptance, reaction and immediate  
212 change in knowledge and skills (Kirkpatrick level 2) (12). Additionally, we compared the cost in  
213 Pounds Sterling per participant of the blended learning approach to the cost of the 5-day face-to-  
214 face training approach.

215

216 To evaluate participant engagement, we monitored the time that participants spent on the self-  
217 directed sessions and compared this to the minimum time necessary to view all the recorded lecture  
218 sections and accompanying videos. To evaluate the participant acceptance and reaction to the  
219 blended learning approach, they were invited to complete an on-line feedback evaluation, using a  
220 Likert-scale together with free comments, at the end of the third component of the training.

221 Learning was evaluated by means of an overall multiple choice (MCQ) knowledge assessment taken  
222 before and after all the course elements. All participants who attended the face-to-face component

223 took part in three objective structured clinical examinations (OSCEs) before and after that part of the  
224 training.

225

## 226 Data collection procedure

227

228 Participants were provided with funds for airtime to enable them to engage on the internet-

229 dependent components of the course. They were provided with both written and video instructions

230 explaining how to engage with the self-directed learning components of the course. A dedicated on-

231 line education consultant provided support to any participant who found engagement with the

232 online learning platform problematic.

233

234 Authors were aware of participants' identities because they were teaching them and also conducting

235 face-to-face objective structured clinical examinations as a part of the evaluation. Participants were

236 issued with an ID number and no names were recorded on evaluation score sheets, only ID numbers.

237 Date concerning results of the evaluations was entered onto a password protected file, accessible

238 only to the educational consultant (AS) who was aware of the ID number of each participant. This

239 was used to provide essential feedback to each participant regarding their performance as and when

240 they requested it.

241

242 For the on-line group discussions 18 volunteer faculty members were recruited in total, including six

243 from Kenya and 12 from UK. Wherever possible, Kenyan and UK faculty members were paired to

244 work together, putting the Kenyan members' greater contextual awareness to good advantage. Each

245 2.5-hour session contained between four to six separate group discussions of durations between 20

246 and 50 minutes. Faculty members moved between groups for each discussion to provide

247 participants with a range of pedagogical approaches. Fifty-three participants attended the face-to-

248 face component. Subnational travel restrictions in place due to the Covid-19 pandemic and weather-

249 related problems prohibited the rest from attending.

250

## 251 Data analysis

252

253 For each assessment tool, the raw scores were converted to percentage scores before analysis.

254 Participants who did not complete both assessments were excluded. Improvement in score was

255 measured as a percentage of the possible improvement, e.g., if the pre-training score was 40% and

256 post training it was 70% then the improvement was half of the maximum potential improvement to

257 100% of 60%, making the improvement score 50%. Where the score decreased the change was

258 relative to the maximum possible reduction. Relative percentage change scores were used to

259 compare performance post-training with pre-training, by using a one sample t-test with the null

260 hypothesis that the mean change was zero. The 5% significance level was used to determine

261 statistical significance.

262

263 All cost data were collected in Pounds Sterling. Analysis was conducted in Microsoft EXCEL (Microsoft

264 Corporation, Redmond, WA, USA). All costs for delivery of each version of the training were

265 collected, these include direct participant costs as applicable (cost of travel for participants and

266 faculty for face-to-face components, daily subsistence allowance, cost of meals during face-to-face

267 training, cost of airtime and Kenya based faculty allowance). All UK faculty volunteered their time, so

268 no cost was allocated to this. The cost of training equipment was not included, as the same set was

269 used for both versions of the training. We modelled the cost for the full 5-day face-to-face approach

270 assuming no UK faculty were required travel to support the Kenya-based faculty. We compared the

271 mean cost per participant for both versions of the training.

272

## 273 Ethical considerations

274

275 Delivery and evaluation of the AOAC using both the traditional and the blended learning approaches

276 was approved by the Kenya Ministry of Health and all participating counties. Completing

277 assessments before and after the training was considered part of the learning experience but  
278 participants could opt out of the assessment if they so desired after reviewing the information  
279 provided at registration. All participants were allocated unique identifying numbers and no  
280 participant identifying information was used to report the findings from this study.

281

282

## 283 Results

284

### 285 Participant satisfaction

286

287 The levels of satisfaction reported with all three elements of the blended learning were high  
288 throughout, and not significantly different from each other.

289

290 Sixty participants completed a questionnaire concerning their satisfaction regarding each facet of  
291 the course that they had attended. Of those who responded, 55 (91.7%) felt satisfied with the  
292 feedback provided as to their progress through the course and 57 (95%) were happy with the level of  
293 support provided by the education consultant.

294

295 23 (38.3%) participants reported intermittent internet connectivity problems. More than half of all  
296 participants (56.6%) reported that they were called away to attend to emergency cases during the  
297 sessions, although, despite this, 46.7% of the participants reported that they were able to  
298 concentrate on the sessions without distractions. Overall, 40 (66.7%) of participants said it was  
299 difficult to get time away from work to join the sessions. When asked if they preferred the on-line  
300 discussions to face to face training, 27 (45%) expressed a preference for on-line teaching. One  
301 participant stated, "Face to face learning is good but I find on-line discussions are able to achieve the  
302 same, maybe we just need to get used to it." However, when those who attended the 1.5 day face-

303 to-face practical skills training were asked at the end about their preferences, 84.9% then stated a  
304 preference for face-to-face training. This difference may have been due to the nature of the  
305 sessions, as the face-to-face sessions focusing on practical skills acquisition may have been  
306 preferable.

307  
308 Several participants suggested that on-line sessions in the evenings might be easier to attend as  
309 compared to those held during normal working hours. It was apparent that many participants  
310 experienced a degree of conflict between concentrating on the sessions and the distraction of  
311 providing clinical care that would have been avoided had the participants been able to book time off  
312 to attend a course away from the workplace.

313  
314 Of those responding to the survey, 58 (96.7%) felt that the content of the self-directed learning  
315 assignments was useful for their work and 57 (95%) thought that engaging with these sessions was a  
316 good use of their time. 59 (98.3%) said they had learned new things that had made them consider  
317 implementing changes to their working practices and they would like to share the contents with  
318 their work colleagues. One participant stated, "I am sorry that I did not have interest in doing the  
319 self-directed part initially, but I am now enjoying and appreciating it." Another remarked "It was  
320 clear and precise. It was very useful to me, and I will still revisit the lectures as a reminder to myself  
321 for better practice."

322  
323 For the on-line facilitated workshops, 59 (98.3%) felt the content was relevant and useful and would  
324 recommend it to a colleague. 58 (96.7%) felt attending the sessions was a good use of their time and  
325 would be implementing changes to their practice consequently.

326  
327 Of those who attended the face-to-face element of the course, 53 (100%) felt the training was  
328 relevant and useful, and that they had learned things that would change their clinical practice. All

329 intended to increase their use of assisted vaginal delivery as a strategy to manage the second stage  
330 of labour in preference to performing a caesarean and all felt that their management of obstetric  
331 anal sphincter injuries would improve. 52 (98.1%) felt it had been a good use of their time and would  
332 recommend the training to a colleague. Across the three components of the course, 60 (100%)  
333 reported that they were either extremely or very satisfied with the overall quality of the training,  
334 and all would recommend it to other doctors. All participants agreed that the course was useful in  
335 improving the quality of care provided to patients.

336

337 Participants were asked to state the three most important things they had learned. Of those who  
338 had attended the face-to-face training, the three most commonly chosen aspects were assisted  
339 vaginal delivery techniques, newborn resuscitation and obstetric anal sphincter injury repair.

340 Techniques for improved caesarean surgery, especially for delivering a deeply impacted fetal head,  
341 also scored highly, as did maternal resuscitation and techniques for performing venous cutdown.

342 When asked what changes they would most like to implement, increasing the use of assisted vaginal  
343 delivery was by far the most popular, followed by consistent use of the WHO Safe Surgical Check List  
344 and a Maternal Early Obstetric Warning Scoring (MEOWS) chart using vital signs to aid prompt  
345 recognition of a deteriorating patient and track their progress in response to interventions. Several  
346 participants commented that they intended to train others in the techniques they had learned.

347

348 The participants who were unable to attend the face-to-face component reported a similar range of  
349 important lessons learned and their choices for implementation included using the MEOWS chart,  
350 use of the WHO Safe Surgical Check List and implementation of regular standards-based clinical  
351 audits in their facilities.

352

## 353 Participant engagement

354

355 Sixty-five doctors engaged to some extent with the self-directed learning component of the blended  
356 training approach. Of these, 42 (64.6%) completed all 21 individual assignments within this  
357 component. A further 11 (16.9%) completed 90% or more. Four (6.2%) participants completed more  
358 than half of the assignments and 8 (12.3%) completed less than half.

359

360 We tracked the maximum time that participants spent watching the recorded lectures and videos  
361 contained within each assignment by monitoring the time taken between completing successive  
362 assignments. Whilst this did not necessarily reveal exactly how long participants spent on the  
363 respective assignments, we were able to spot those who appeared to skim through sequential  
364 assignments without adequate viewing time, or those who tried to attempt the quiz without  
365 watching the videos. Those assignments where more participants spent less than an appropriate  
366 amount of time watching included the final three assignments on the course; post-operative  
367 analgesia and anaesthetic follow up, counselling for the next birth and documentation, audit and  
368 quality of care, with 75%, 75% and 66% full engagement respectively. Other less popular  
369 assignments were safe anaesthesia (86% full engagement), safe blood transfusion (83%), managing  
370 the second stage of labour (88%) and surgical techniques and best practices for caesarean section  
371 (82%).

372

373 In total, 60 participants logged on for all or part of the five on-line discussion groups, that took place  
374 daily over five days. 54 (90%) of participants logged on for four or five days, with 38 (63.3%) present  
375 on all five occasions.

376

## 377 **Change in knowledge and skills**

378

379 After each individual assignment participants were invited to complete a short quiz to assess their  
380 learning. The pass mark was set at 70%, and participants were provided with an explanation as to  
381 the rationale for the correct answer and offered the opportunity to repeat the test. When asked if

382 and why they had repeated any tests, 18 (27.7%) participants said they wanted to improve their  
 383 knowledge, 20 (30.8%) stated that they wanted to pass the assignment and a further 7 (10.7%)  
 384 wanted to achieve a better mark. 57 (87.7%) participants had read the explanatory comments and of  
 385 these, all but one found them useful.

386  
 387 All participants were invited to take part in a pre and post course MCQ knowledge test on-line. 61  
 388 participants completed both components. All 53 participants who attended the face-to-face  
 389 component took part in Objective Structured Clinical Examinations (OSCEs) before and after the two  
 390 days of training. The OSCE topics used were maternal airway management, newborn resuscitation  
 391 and assisted vaginal birth. Improvement in scores occurred in both the on-line knowledge tests and  
 392 OSCEs. The improvements in OSCE scores were more marked for those participants starting from a  
 393 lower baseline.

394  
 395 Before training the mean (95% CI) MCQ score was 67% (65%-68%), whereas the mean total OSCE  
 396 score was only 41% (39%-43%). For each of the OSCEs the mean (95% CI) score was similar, ranging  
 397 from 39% (37%-42%) for the airways OSCE and 43% (40%-46%) for neonatal OSCE (Table 2).

398  
 399 **Table 2: Comparison of knowledge and skills percentage scores post training with pre-training.**

| Tool                           | Mean (95% CI) score |               | Relative improvement<br>(95% CI) | p-value |
|--------------------------------|---------------------|---------------|----------------------------------|---------|
|                                | Pre-training        | Post-training |                                  |         |
| MCQ                            | 67 (65-68)          | 84 (83-85)    | 50 (47-54)                       | <0.001  |
| Total OSCE                     | 41 (39-43)          | 85 (83-86)    | 74 (73-76)                       | <0.001  |
| Assisted Vaginal Birth<br>OSCE | 41 (38-43)          | 77 (75-80)    | 61 (57-65)                       | <0.001  |
| Neonatal resuscitation<br>OSCE | 43 (40-46)          | 91 (90-92)    | 83 (80-86)                       | <0.001  |
| Airway management<br>OSCE      | 39 (37-42)          | 86 (84-87)    | 76 (73-78)                       | <0.001  |

400



401 There were five instances of a reduction in score after training compared with before training. Four  
402 were for the MCQ and one for the AVB OSCE, otherwise all participants OSCE scores and MCQ scores  
403 did not decrease. Figure 1 summarises the distribution of relative improvement scores.

404

405 **Fig 1. Boxplots of the distribution of relative changes in scores for each assessment tool.**

406

407 After training there were statistically significant relative improvements ( $p < 0.001$  in each case) for  
408 MCQs and for each OSCE, compared with before training (Table 2). For MCQs, which had a higher  
409 percentage score before training, the mean (95% CI) relative improvement was 50% (47%-54%). For  
410 OSCEs the relative improvements were higher, with the mean (95% CI) being 61% (57%-65%) for  
411 AVB, 76% (73%-78%) for maternal airway management and 83% (80%-86%) for neonatal  
412 resuscitation.

413

## 414 Comparison of cost of both approaches

415

416 The allowance for each Kenyan facilitator was in line with the Kenyan MoH guidelines, £56.10 per  
417 day for the face-to-face aspects of the training and £28.57 per day for the virtual workshop  
418 facilitation.

419

420 With regard to the practical skills training, in the blended approach 6 Kenya facilitators trained 53  
421 participants in 3 groups, each group trained over 2 days. On the fully face-to-face course the same  
422 number of participants would have been trained in 2 groups, each trained over 5 days. The  
423 participant costs for the face-to-face component of the blending learning approach were £15,051  
424 and the same cost for a full 5-day face-to-face course would have been £25,844. Therefore, the  
425 blended training approach costs £207 less per participant (assuming 6 facilitators and 53 participants  
426 for both courses) compared to the full 5-day face-to-face training approach.

427

428

## 429 Discussion

430

431 We have demonstrated the feasibility of converting a five-day face-to-face advanced obstetric  
432 surgical course into a blended learning course in Kenya, reducing the face-to-face component to 1.5  
433 days. The training was well received by most participants and both knowledge and practical skills  
434 demonstrably improved following the course. The cost saving per participant for our course was  
435 £207 (USD 250, Euro 236) after considering hotel and conference centre costs and funding for  
436 airtime. This represents a cost saving of 40% as compared to our fully face-to-face course, excluding  
437 travel expenses, which would have been incurred with either method of course delivery. Our course  
438 also resulted in a 3-day reduction of the time that staff are away from their workplace. Similar cost  
439 savings have been reported in association with another blended learning training approach (21).

440

441 There is a growing body of literature evaluating the acceptability and outcomes of blended learning  
442 in healthcare training, although direct comparisons of effectiveness are complicated by the  
443 heterogeneity of the blended learning methods employed. A systematic review by Valée et al,  
444 comparing traditional learning methods to blended learning in medical education, concluded that  
445 blended learning demonstrated consistently better effects on knowledge outcomes when compared  
446 with traditional learning in health education (22). However, of the 56 studies included in this review,  
447 only one was conducted in sub-Saharan Africa (23) and only one concerned midwifery or obstetrics  
448 (24).

449

450 The training we have described was introduced as a pragmatic solution to the challenges posed by  
451 the Covid-19 pandemic to in-service training, rather than as part of a study comparing the blended  
452 learning method of training to a fully face-to-face course. We therefore are not able to provide  
453 evidence as to whether the results we obtained from a blended learning delivery demonstrated

454 greater, the same or lesser improvement in knowledge and skills acquisition. Nevertheless, we have  
455 been able to demonstrate a highly significant relative improvement in both knowledge and skills of  
456 participants between before and after tests, with improvements comparable to a before and after  
457 study of knowledge and skills from a multi-country study of face-to-face emergency obstetric skills  
458 training (14).

459  
460 Our choice of on-line platform for the self-directed component was made taking into consideration  
461 the need for sustainability. Although some bespoke platforms would have been easier to work with,  
462 we prioritised choosing a platform that was available at no cost because we wanted it to remain  
463 freely available in the future to participants. If courses such as this are to be available to health  
464 workers in low resource settings maintaining access at zero or low cost is important. Following the  
465 pilot of the blended learning delivery approach, we have now hosted the self-directed learning  
466 component on the World Continuing Education Alliance (WCEA) platform. Health worker  
467 professional and regulatory bodies in most of sub-Saharan Africa have validated courses on this  
468 platform for continuous professional development (CPD). All courses on the WCEA platform are  
469 available free of charge to health workers from low-and-middle income countries.

470  
471 One disadvantage of providing internet-based training remains the cost of purchasing air time.  
472 Although the internet is widely available, many health workers in low resource settings do not have  
473 contracts with unlimited internet availability and they may struggle to fund air time for training  
474 unless provided with financial support. We did fund air time for this course, but this would inevitably  
475 affect sustainability if funding was not provided. However, in several countries in sub-Saharan Africa  
476 CPD is increasingly becoming mandatory for health workers linked to practice license renewal. Policy  
477 makers need to make allowance for covering training costs as part of an overall strategy to ensure  
478 competent skilled birth personnel, a key strategy to achieving the SDG3 maternal mortality  
479 reduction target.

480

481 Aware of the difficulties that participants might encounter using an unfamiliar platform, in  
482 mitigation we provided them with a document and video explaining platform navigation step by  
483 step. This worked well for most of the participants, despite their lack of familiarity with the platform.

484

485 Tracking the extent to which participants engaged with the on-line components was key to our  
486 evaluation of this course. Some participants stated in feedback that they tended to avoid certain  
487 topics because they had judged that they already knew enough about these topics. Other  
488 participants explained that they had watched the videos throughout but had exploited the facility on  
489 the platform to watch at a faster than normal speed. The ability to pick and choose which aspects of  
490 the course to focus on could represent a good use of participant's time, although this does rely on  
491 the accuracy of their judgement as to the adequacy of their knowledge.

492

493 We had explained to participants that the self-directed component would take approximately 15  
494 hours to complete, and assignments were released to the participants two weeks prior to the on-line  
495 discussion group component. Nevertheless, some participants felt that they did not have sufficient  
496 time to complete all the assignments, commenting that they struggled to complete the lectures in  
497 between reporting daily for work and having very short times off duty due to staff shortages. 10  
498 (15.4%) of the participants reported that the self-directed assignments took longer to complete than  
499 they had expected. Earlier release of the self-directed component to participants may reduce time  
500 pressures in future.

501

502 It was clear that a significant number of participants found it difficult to book time off from their  
503 work commitments to enable them to attend the on-line discussion groups. Learning in the  
504 discussion groups may have been compromised by participants becoming distracted by on-going  
505 clinical issues in the workplace. Although we ensured that only half of the doctors attending the

506 discussion groups from any facility were booked for any given session, nevertheless, due to staff  
507 shortages it proved impossible for some doctors to give the groups their undivided attention. The  
508 2.5-hour duration of the sessions may have been a factor, as booking this time off work may have  
509 been more challenging when compared to booking an entire day or half day. This may have  
510 encouraged doctors to hope for the best regarding clinical workload and try to manage clinical  
511 commitments and attend the sessions simultaneously. A potential solution would be to run these  
512 sessions in the evening, depending upon acceptability to both participants and faculty. However,  
513 concerns have been expressed regarding the potential for on-line learning to invade participants'  
514 everyday lives suggesting evening sessions may not be suitable for all participants (25).

515

516 Running the discussion groups on-line enabled UK and Kenyan faculty members to work together  
517 without the need for either international or national travel. This enabled international collaboration  
518 whilst removing the requirement for travel, providing cost savings and environmental benefits.  
519 Faculty members from both settings enjoyed working in collaboration and learned from each other.

520

521 Although, in the context of the Coronavirus pandemic, converting 100% of the training to internet  
522 based would have been preferable, it was considered that it would have been very challenging for  
523 participants to acquire the necessary clinical skills in the absence of the opportunity for hands on  
524 practice that the face-to-face element provided. Some skills improvement may occur from watching  
525 video demonstrations, but supervised hands-on practice using high fidelity models has a track record  
526 of success (14) and this was replicated here as evidenced by the improvement in OSCE scores.

527

528 Of concern were the low pre-course OSCE scores for basic clinical skills across all cadres. The medical  
529 officers' and interns' scores were low across all OSCEs. Medical officers form the backbone of service  
530 provision in many facilities, especially at sub-county level, where they provide obstetric care, usually  
531 without senior supervision. From our initial assessment, none of the medical officers were able to

532 demonstrate basic clinical skills sufficient to safely manage a maternal airway and provide  
533 ventilation using an Ambu® bag and mask, and only one was able to demonstrate competency in  
534 newborn resuscitation. Similarly, only one medical officer had appropriate AVD skills. This may  
535 explain the reticence to conduct assisted vaginal birth seen in some Kenyan health facilities (26).  
536 Although doctors in Kenya are expected to provide evidence of CPD, these findings would suggest  
537 that a more prescriptive approach to the nature of CPD activities would be of benefit, including  
538 regular clinical skills training for doctors at all levels, as is the case in some other countries where  
539 mandatory training includes regular updates on basic resuscitation skills. This training has  
540 demonstrated a significant uplift in skills after a short intervention. Although we have not been able  
541 yet to demonstrate sustained improvement, previous evidence suggests that skills are retained for at  
542 least a year (15). Participants themselves clearly recognised the need to improve the provision of  
543 assisted vaginal birth in their units, and to practice and teach improved resuscitation skills for both  
544 mothers and babies, as judged by their stated intentions on finishing the training.

545

## 546 Limitations

547

548 We acknowledge that it is not possible to report the exact degree of engagement with the on-line  
549 components of this training. However, even when sitting in a face-to-face lecture, it is possible for  
550 the participant's mind to wander, hence attention cannot be directly measured in either situation.  
551 This study did not set out to measure comparative effectiveness between traditional face-to-face  
552 and blended learning teaching methods but rather the acceptability and feasibility of blended  
553 learning in the context described. We acknowledge that it will be important to compare the impact  
554 of both versions of the training on maternal and newborn health outcomes.

555

556 Across the cadres, the majority of those recruited were medical officers, with smaller numbers of  
557 the other cadres and the results for these cadres may not be generalisable. While the content of the  
558 training was more suitable for medical doctors, midwives and anaesthetists are involved in peri-

559 operative and postnatal care, and a multidisciplinary training is likely to facilitate change in practice  
560 and behaviour.

561

562

## 563 Conclusion

564

565 We have demonstrated that a blended learning approach to clinical training in a low resource setting  
566 is feasible and sustainable, resulting in a reduction in time taken for face-to-face training, with this  
567 component being reserved for practical skills acquisition. We recommend that consideration is given  
568 to the development of a more structured approach to continued professional development for  
569 doctors providing obstetric services, to include mandatory clinical skills updates on a regular basis.

570

571

## 572 Funding information

573

574 CAA received funding from United Kingdom Foreign, Commonwealth & Development Office,

575 Reducing Maternal and Neonatal Deaths in Kenya. Grant number 202549: March 2014-March 2023.

576 The funder had no role in the study design, data collection and analysis, decision to publish or  
577 preparation of the manuscript.

578

579

## 580 References

581

- 582 1. Trends in maternal mortality 2000 to 2020: estimates by WHO, UNICEF, UNFPA, World Bank  
583 Group and UNDESA/Population Division. Geneva: World Health Organization; 2023. Licence:  
584 CC BY-NC-SA 3.0 IGO

- 585 2. Boerma T, Ronsmans C, Melesse DY, Barros AJD, Barros FC, Juan L, et al. Global epidemiology  
586 of use of and disparities in caesarean sections. *Lancet* [Internet]. 2018 Oct 13 [cited 2018  
587 Nov 25];392(10155):1341–8. Available from:  
588 <https://www.sciencedirect.com/science/article/pii/S0140673618319287?via%3Dihub>
- 589 3. Molina G, Weiser TG, Lipsitz SR, et al. Relationship Between Cesarean Delivery Rate and  
590 Maternal and Neonatal Mortality. *JAMA*. 2015;314(21):2263–2270.  
591 doi:10.1001/jama.2015.15553
- 592 4. Althabe F, Sosa C, Belizan JM, Gibbons L, Jacquerioz F, Bergel E. Cesarean section rates and  
593 maternal and neonatal mortality in low-, medium-, and high-income countries: an ecological  
594 study. *Birth (Berkeley, Calif)* 2006;33:270–7
- 595 5. Sandall J, Tribe RM, Avery L, Mola G, Visser GH, Homer CS, et al. Short-term and long-term  
596 effects of caesarean section on the health of women and children. *Lancet*.  
597 2018;392(10155):1349–57.
- 598 6. Bishop D, Dyer RA, Maswime S, Rodseth RN, van Dyk D, Kluyts HL, et al. Maternal and  
599 neonatal outcomes after caesarean delivery in the African Surgical Outcomes Study: a 7-day  
600 prospective observational cohort study. *Lancet Glob Heal*. 2019;7(4).
- 601 7. Sobhy S, Arroyo-Manzano D, Murugesu N, Karthikeyan G, Kumar V, Kaur I, et al. Maternal  
602 and perinatal mortality and complications associated with caesarean section in low-income  
603 and middle-income countries: a systematic review and meta-analysis. *Lancet* [Internet].  
604 2019 Mar [cited 2019 Mar 30]; Available from:  
605 <https://linkinghub.elsevier.com/retrieve/pii/S0140673618323869>
- 606 8. Maswime T, Buchmann E. Near-miss maternal morbidity from severe haemorrhage at  
607 caesarean section: A process and structure audit of system deficiencies in South Africa. *S Afr*  
608 *Med J* [Internet]. 2017 Nov 1 [cited 2021 Aug 5];107(11):1005–9. Available from:  
609 <https://pubmed.ncbi.nlm.nih.gov/29262944/>



- 610 9. Muthigani W, Ameh CA, Godia, M P, Mgamb E, Maua JM, Okoro D, et al. Saving Mothers  
611 Lives 2017. First Confidential Report into Maternal Deaths in Kenya. [Internet]. 2017 [cited  
612 2019 Apr 5]. Available from: [https://cmnh.lstmed.ac.uk/sites/default/files/content/centre-](https://cmnh.lstmed.ac.uk/sites/default/files/content/centre-news-articles/attachments/CEMD Main Report Sept 3 FINAL- Full Report.pdf)  
613 [news-articles/attachments/CEMD Main Report Sept 3 FINAL- Full Report.pdf](https://cmnh.lstmed.ac.uk/sites/default/files/content/centre-news-articles/attachments/CEMD Main Report Sept 3 FINAL- Full Report.pdf)
- 614 10. Betrán AP, Temmerman M, Kingdon C, Mohiddin A, Opiyo N, Torloni MR, et al. Interventions  
615 to reduce unnecessary caesarean sections in healthy women and babies. *Lancet*.  
616 2018;392(10155):1358–68.
- 617 11. Bailey P, Roosmalen J van, Mola G, Evans C, Bernis L de, Dao B. Assisted vaginal delivery in  
618 low and middle-income countries: an overview. *BJOG*. 2017;124:1335–44.
- 619 12. Boelens R, Van Laer S, De Wever B, Elen J. Blended learning in adult education: towards a  
620 definition of blended learning. *Osguthorpe & Graham* [Internet]. 2015 [cited 2021 Aug 5];  
621 Available from: <http://hdl.handle.net/1854/LU-6905076>
- 622 13. Ameh CA, van den Broek N. Making It Happen: Training health-care providers in emergency  
623 obstetric and newborn care. *Best Pract Res Clin Obstet Gynaecol* [Internet]. 2015 Nov [cited  
624 2018 Dec 20];29(8):1077–91. Available from:  
625 <http://www.ncbi.nlm.nih.gov/pubmed/25911056>
- 626 14. Ameh CA, Kerr R, Madaj B, Mdegela M, Kana T, Jones S, et al. Knowledge and skills of  
627 healthcare providers in sub-Saharan Africa and Asia before and after competency-based  
628 training in emergency obstetric and early Newborn Care. *PLoS One*. 2016;11(12).
- 629 15. Ameh CA, White S, Dickinson F, Mdegela M, Madaj B, Van Den Broek N. Retention of  
630 knowledge and skills after Emergency Obstetric Care training: A multicountry longitudinal  
631 study. *PLoS One*. 2018;
- 632 16. Ameh C, Adegoke A, Hofman J, Ismail FM, Ahmed FM, Van Den Broek N. The impact of  
633 emergency obstetric care training in Somaliland, Somalia. *Int J Gynecol Obstet*. 2012;117(3).
- 634 17. Raven J, Utz B, Roberts D, Van Den Broek N. The “Making it Happen” programme in India  
635 and Bangladesh. *BJOG An Int J Obstet Gynaecol*. 2011;

- 636 18. Bullock I, Davis M, Lockey A, Mackway-Jones K. Pocket Guide to Teaching for Clinical  
637 Instructors. Pocket Guid to Teach Clin Instr [Internet]. 2015 Jul 31 [cited 2021 Aug 6];  
638 Available from: <https://onlinelibrary.wiley.com/doi/book/10.1002/9781119088769>
- 639 19. Allott H, Ameh C, Saddington F, Fitzgerald A. Advanced Comprehensive Obstetric,  
640 Anaesthetic and Newborn Care A Manual for Facilitators. 1st ed. Allott H, Ameh C, editors.  
641 Liverpool: Emergency Obstetric Care and Quality of Care Unit LSTM; 2020.
- 642 20. Allott H, Ameh C, Saddington F, Fitzgerald A. Advanced Comprehensive Obstetric  
643 Anaesthetic and Newborn Care-A manual for Participants [Internet]. 1st ed. Ameh C, Allott  
644 H, editors. Vol. 1. Liverpool: LSTM; 2019 [cited 2021 Aug 6]. Available from:  
645 [https://www.lstmed.ac.uk/sites/default/files/participants\\_manual.pdf](https://www.lstmed.ac.uk/sites/default/files/participants_manual.pdf)
- 646 21. Dankbaar ME, Storm DJ, Teeuwen IC, Schuit SC. A blended design in acute care training:  
647 similar learning results, less training costs compared with a traditional format. Perspectives  
648 on Medical Education. 2014 Sep;3(4):289-299. doi: 10.1007/s40037-014-0109-0. PMID:  
649 24477971; PMCID: PMC4152470
- 650 22. Vallée A, Blacher J, Cariou A, Sorbets E. Blended Learning Compared to Traditional Learning in  
651 Medical Education: Systematic Review and Meta-Analysis. J Med Internet Res. 2020 Aug  
652 10;22(8):e16504. doi: 10.2196/16504. PMID: 32773378; PMCID: PMC7445617
- 653 23. Mars M, McLean M. Students' perceptions of a multimedia computer-aided instruction  
654 resource in histology. S Afr Med J. 1996 Sep;86(9):1098–102
- 655 24. Gerdprasert, S., Pruksacheva, T., Panijpan, B., and Ruenwongsa, P. (2010). Development of a  
656 web-based learning medium on mechanism of labour for nursing students. *Nurse Educ. Today*  
657 30, 464–469. doi:10. 1016.nedt.2009.10.007.
- 658 25. Smyth S, Houghton C, Cooney A and Casey D. Students' experiences of blended learning  
659 across a range of postgraduate programmes. *Nurse Education Today*. 2012; Vol32, Issue 4  
660 p464-468.

- 661 26. Dickinson F M, Allott H, Nyongesa P, Eyinde M, Muchemi OM, Karangau SW, et al. It's  
662 complicated...: Exploring the missed opportunities and reasons for non-performance of  
663 assisted vaginal births in Kenya. [Preprint] Available at:  
664 <https://www.medrxiv.org/content/10.1101/2022.12.21.22283818v1/j>

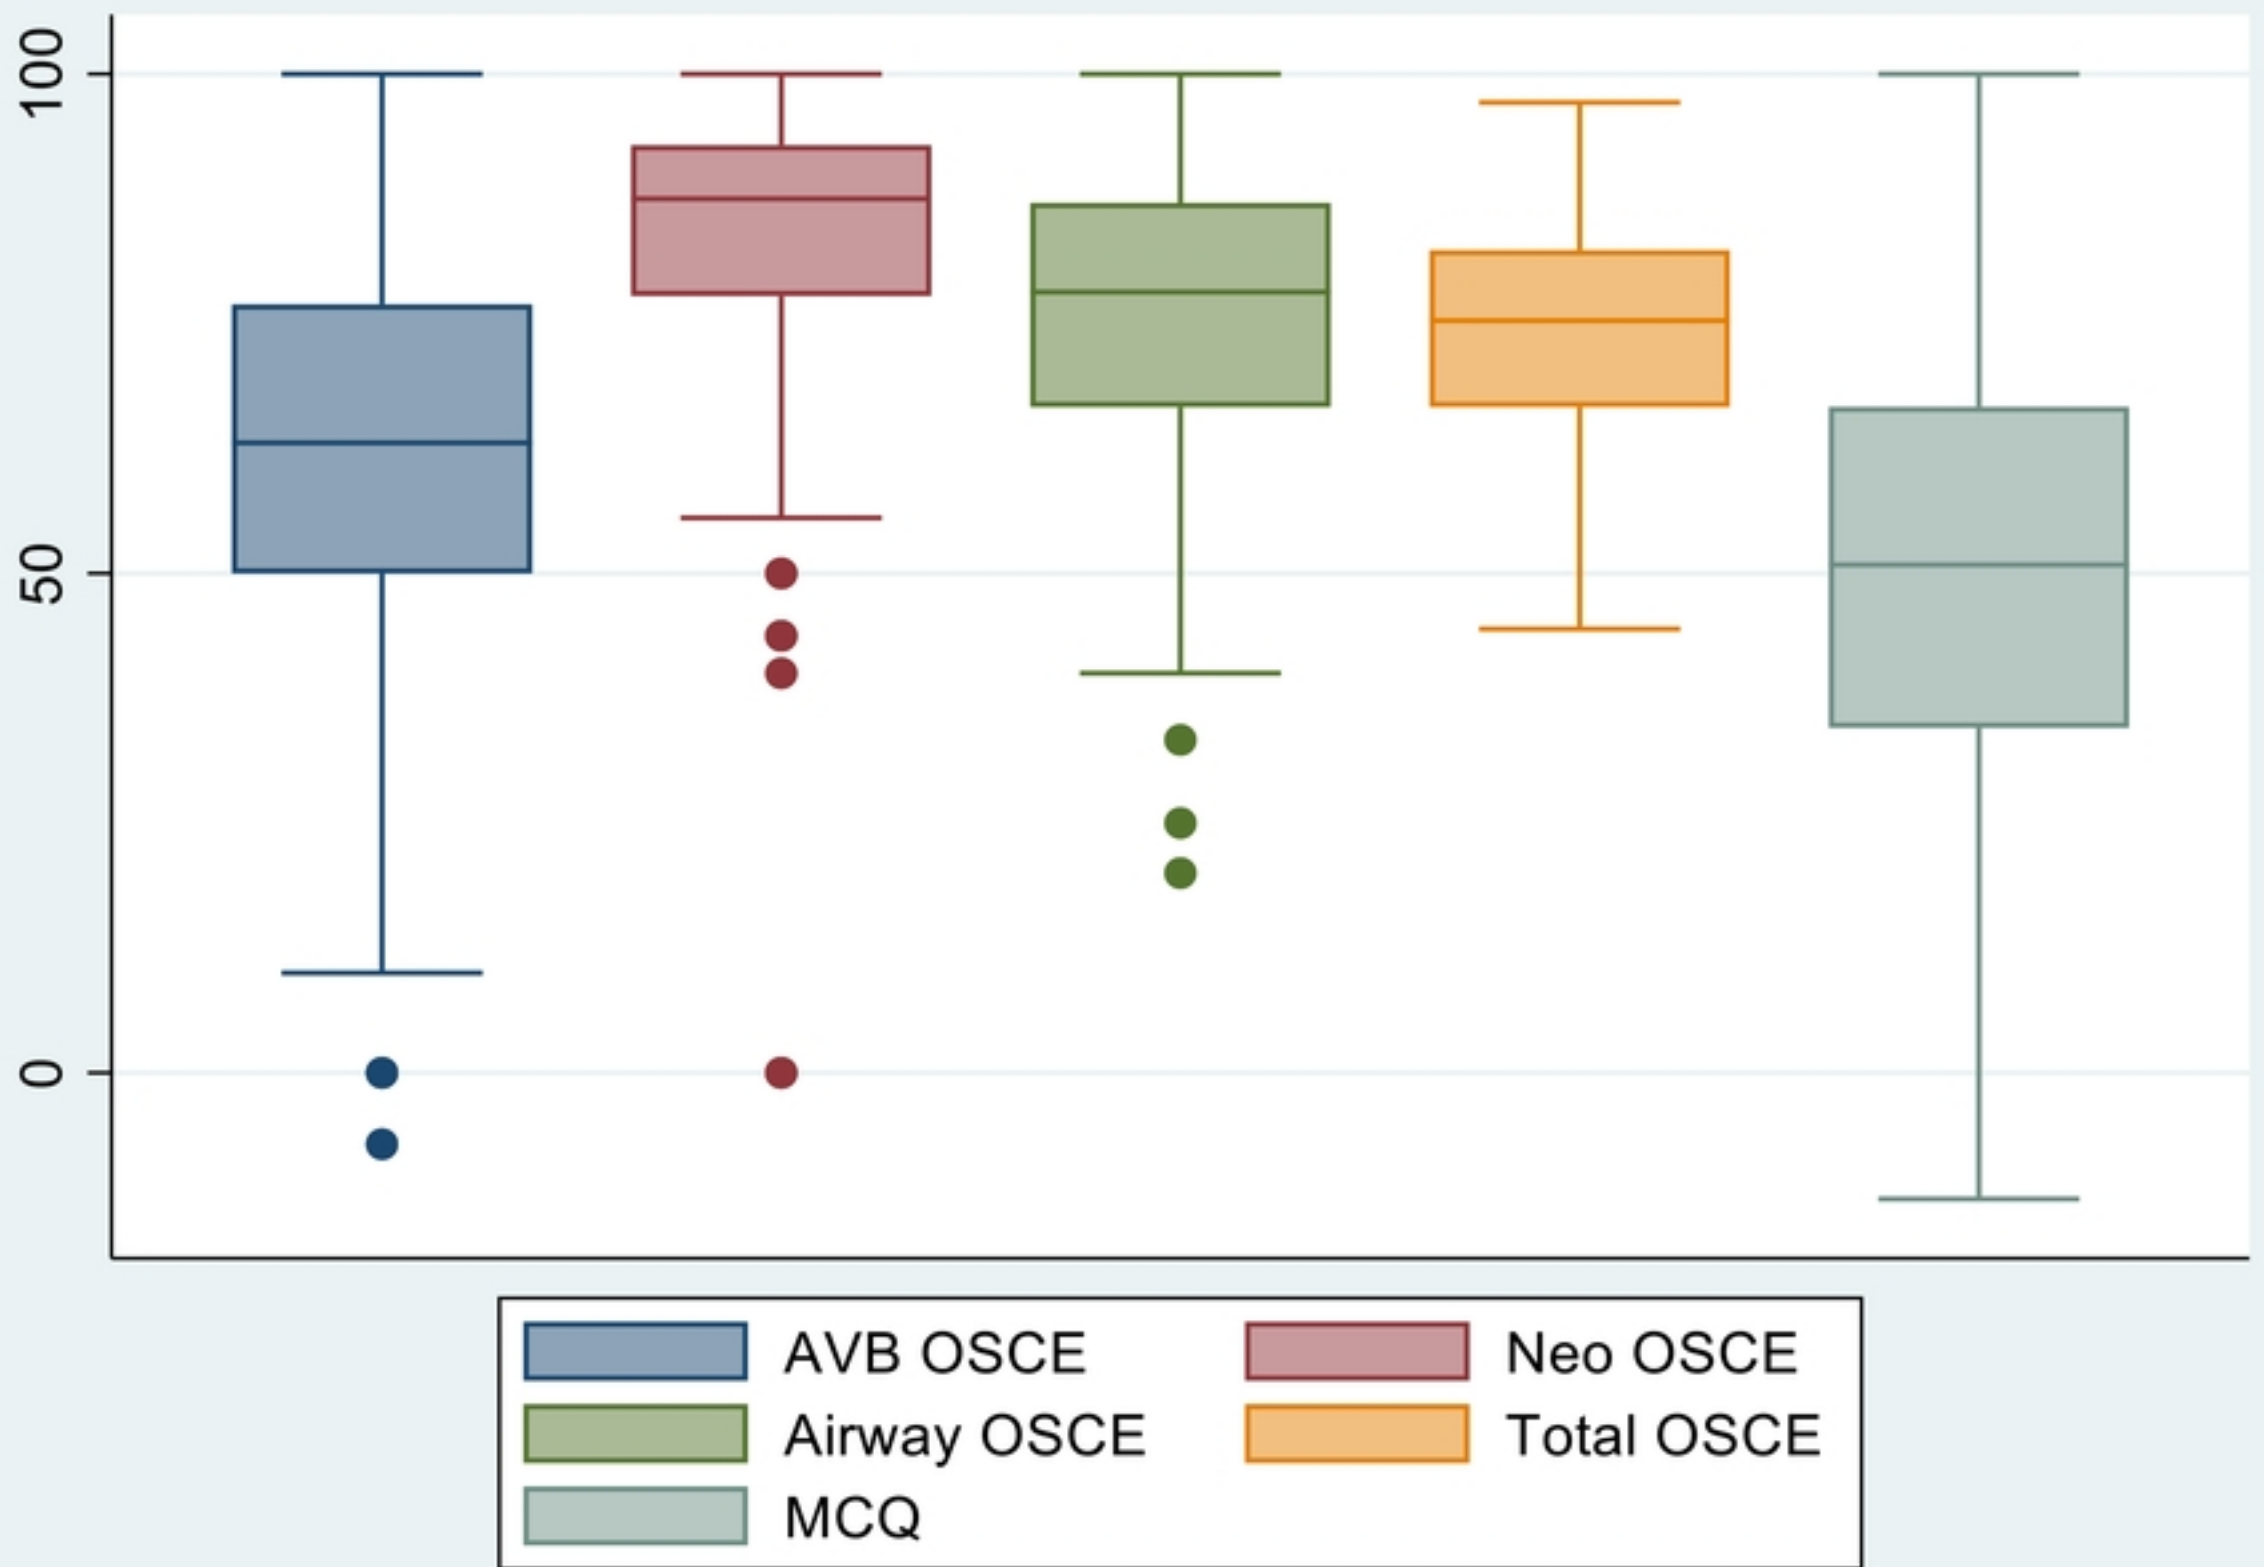

Figure
